# Supplementary material
Source: Springer Nature journal article supplement (https://www.springermedizin.de/resource/supplementary/13550_2013_179_MOESM3_ESM.pdf/9687756)

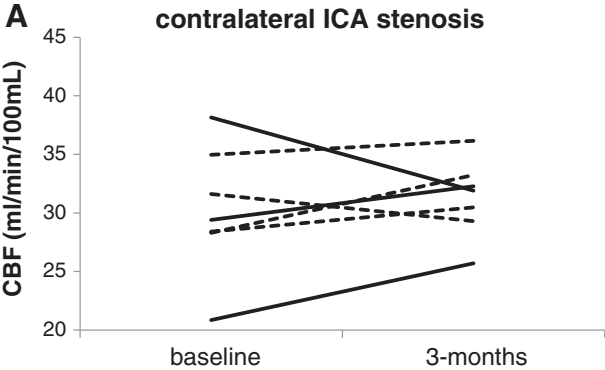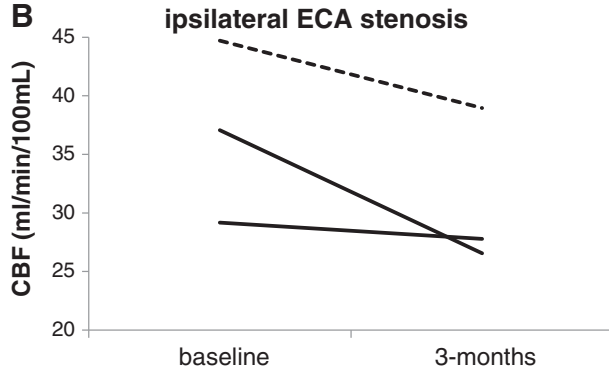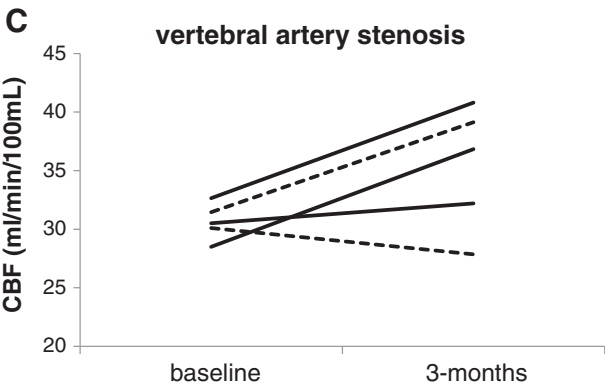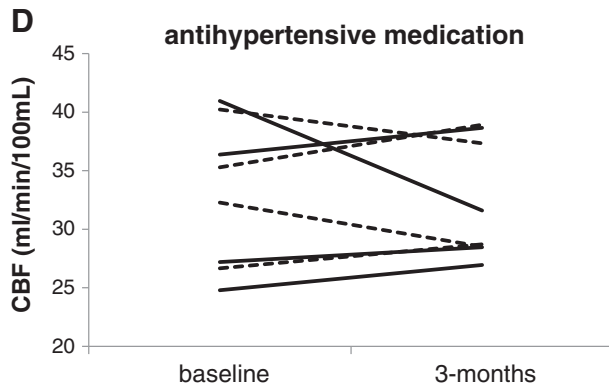

Supplement: MOESM3 [file 9687756]
